# Supplementary material for: Tinning the carbon: hydrostannanes strike back
Source: Royal Society of Chemistry journal article supplement (doi:10.1039/d2dt03545f), 2022-11-18
Supplement: d2dt03545f1.pdf [file d2dt03545f1.pdf]

## Tinning the Carbon: Hydrostannanes Strikes Back

Pavel Rublev,<sup>a,‡</sup> Nikolay V. Tkachenko,<sup>a,‡</sup> Anton S. Pozdeev,<sup>a</sup> and Alexander I. Boldyrev<sup>\*a</sup>

a. Department of Chemistry and Biochemistry, Utah State University, Logan, Utah 84322, United States.  
E-mail: a.i.boldyrev@usu.edu;

‡ Those authors contributed equally

## Supporting Information

### Contents

|                                                                                                                          |           |
|--------------------------------------------------------------------------------------------------------------------------|-----------|
| <b>S1. Population size in Coalescence Kick simulations.....</b>                                                          | <b>2</b>  |
| <b>S2. Example of SA-MD Global Optimization execution script .....</b>                                                   | <b>2</b>  |
| <b>S3. Examples of SA-MD Global Optimization trajectory .....</b>                                                        | <b>4</b>  |
| <b>S5. Spin-state energy difference .....</b>                                                                            | <b>5</b>  |
| <b>S6. Sn<sub>2</sub>H<sub>x</sub> and Sn<sub>3</sub>H<sub>y</sub> global minimum geometries (XYZ coordinates) .....</b> | <b>5</b>  |
| <b>S7. AdNDP analysis of Sn<sub>2</sub>H<sub>x</sub> and Sn<sub>3</sub>H<sub>y</sub> global minimum structures .....</b> | <b>9</b>  |
| <b>S8. AdNDP analysis of Sn<sub>2</sub>H<sub>x</sub> and Sn<sub>3</sub>H<sub>y</sub> classic-like structures .....</b>   | <b>16</b> |
| <b>S9. Coordinates (XYZ) of classic-like Sn<sub>2</sub>H<sub>x</sub> and Sn<sub>3</sub>H<sub>y</sub> structures.....</b> | <b>19</b> |

## S1. Population size in Coalescence Kick simulations

*Table S1. Population size in Coalescence Kick simulations*

| Stoichiometry           | Population Size | Stoichiometry           | Population Size |
|-------------------------|-----------------|-------------------------|-----------------|
| $\text{Sn}_2\text{H}$   | 750             | $\text{Sn}_3\text{H}_2$ | 1000            |
| $\text{Sn}_2\text{H}_2$ | 1000            | $\text{Sn}_3\text{H}_3$ | 1000            |
| $\text{Sn}_2\text{H}_3$ | 1000            | $\text{Sn}_3\text{H}_4$ | 2000            |
| $\text{Sn}_2\text{H}_4$ | 1000            | $\text{Sn}_3\text{H}_5$ | 3000            |
| $\text{Sn}_2\text{H}_5$ | 2000            | $\text{Sn}_3\text{H}_6$ | 5000            |
| $\text{Sn}_2\text{H}_6$ | 3000            | $\text{Sn}_3\text{H}_7$ | 7000            |
| $\text{Sn}_3\text{H}$   | 1000            | $\text{Sn}_3\text{H}_8$ | 10000           |

## S2. Example of SA-MD Global Optimization execution script

```
%md

Cell Cube 10 Spring 20
# Cell cube creates cubic wall around center of mass
# Spring is an elastic constant (kJ/mol) within quadratic potential
Minimize LBFGS Steps 5 Noise 0.45
# L-BFGS minimization is only needed for generating adequate initial
# structure. Noise generates random atomic displacements

# The next block is an MD Block
Initvel 1500_K
# Velocities generation for concrete temperature
Thermostat NHC Timecon 1_fs Massive Chain 5 MTS 5 # Thermostat settings
Timestep 0.5_fs # Integrand step length
Run 500 # How much steps in MD trajectory

# The next block is an annealing block

Minimize Anneal Steps 3000 TempConv 1250_K Noise 0.1
# TempConv is a convergence temperature
# Noise is a random atomic displacement
Dump Position Format XYZ Stride 0 Filename "Geometry_1500.xyz"
# Put the final geometry in the new file

Initvel 1250_K # New random velocities for the next temperature step
Thermostat NHC 1250 Timecon 1_fs Massive Chain 4 MTS 5
Run 400
Timestep 0.5_fs
Minimize Anneal Steps 3000 TempConv 1000_K Noise 0.1
Dump Position Format XYZ Stride 0 Filename "Geometry_1250.xyz"
```

```
Initvel 1000_K
Thermostat NHC 1000 Timecon 2_fs Massive Chain 4 MTS 5
Run 400
Timestep 0.5_fs
Minimize Anneal Steps 3000 TempConv 800_K Noise 0.1
Dump Position Format XYZ Stride 0 Filename "Geometry_1000.xyz"

Initvel 800_K
Thermostat NHC 800 Timecon 2_fs Massive Chain 3 MTS 5
Timestep 0.5_fs
Run 300
Minimize Anneal Steps 3000 TempConv 600_K Noise 0.1
Dump Position Format XYZ Stride 0 Filename "Geometry_800.xyz"

Initvel 600_K
Thermostat NHC 600 Timecon 2_fs Massive Chain 3 MTS 5
Timestep 0.5_fs
Run 300 CenterCOM
Minimize Anneal Steps 3000 TempConv 300_K Noise 0.1
Dump Position Format XYZ Stride 0 Filename "Geometry_600.xyz"

Initvel 300_K
Thermostat NHC 300 Timecon 5_fs
Timestep 0.5_fs
Run 200
Minimize Anneal Steps 3000 TempConv 100_K Noise 0.05
Dump Position Format XYZ Stride 0 Filename "Geometry_300.xyz"

Initvel 100_K
Thermostat NHC 100 Timecon 5_fs
Timestep 0.5_fs
Run 100
Minimize Anneal Steps 3000 TempConv 50_K Noise 0.05
Dump Position Format XYZ Stride 0 Filename "Geometry_100.xyz"

Initvel 50_K
Thermostat NHC 50 Timecon 5_fs
Timestep 0.5_fs
Run 100
Minimize Anneal Steps 3000 TempConv 5_K Noise 0.025
Dump Position Format XYZ Stride 0 Filename "Geometry_50.xyz"

Initvel 5_K
Thermostat NHC 5 Timecon 10_fs
Timestep 0.5_fs
Run 100
Minimize Anneal Steps 3000 TempConv 1_K Noise 0.01
Dump Position Format XYZ Stride 0 Filename "Geometry_5.xyz"

# Final L-BFGS geometry optimization
Minimize LBFGS Steps 3000 StepLimit 0.1
Dump Position Format XYZ Stride 0 Filename "Geometry_Final.xyz"

End
```

### S3. Examples of SA-MD Global Optimization trajectory

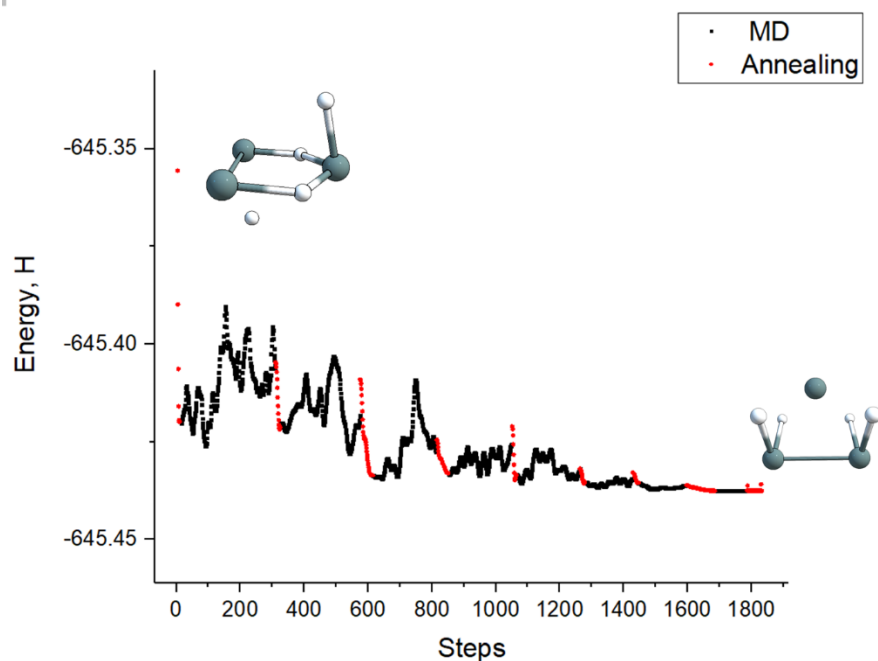

**Figure S3.** Global Optimization trajectory of  $\text{Sn}_3\text{H}_4$ : red dots correspond to simulated annealing blocks, black dots correspond to MD blocks

### S4. Execution performance of global optimization techniques

In this section we compared the execution performance of used global optimization techniques toward optimization of  $\text{Sn}_3\text{H}_2$ ,  $\text{Sn}_3\text{H}_4$ , and  $\text{Sn}_3\text{H}_6$  stoichiometries. It is worth to mention, this performance overview carries only an approximate character. Due to completely different program codes, linked MPI packages, OpenMP implementation, and architecture of computational clusters, timings and performance (in sense of core-hours) have a low quantitative meaning. For example, the absence of AVX-512 instructions steadily reduces performance of the Gaussian16 suite.

**Table S4.** An overview of execution performance. All calculations were performed using one computational node and different number of cores: 8 cores for CK calculations, 32 cores for SA-MC, and 32 cores for SA-MD calculations.

| Stoichiometries         | CK, core-hours | SA-MC, core-hours | SA-MD, core-hours |
|-------------------------|----------------|-------------------|-------------------|
| $\text{Sn}_3\text{H}_2$ | 111.84         | 90.61             | 122.88            |
| $\text{Sn}_3\text{H}_4$ | 452.08         | 149.51            | 153.6             |
| $\text{Sn}_3\text{H}_6$ | 1540.88        | 244.03            | 225.28            |

## S5. Spin-state energy difference

**Table S5.** Spin-state energy difference. Energy differences were calculated on U-RSX-PBE-QIDH / [SARC/def2]-ZORA-TZVPP level of theory. Global minimum geometries were obtained through SA-MD minimization.

| Stoichiometries                    | $E^T - E^S$ , kcal/mol | Stoichiometries                    | $E^D - E^Q$ , kcal/mol |
|------------------------------------|------------------------|------------------------------------|------------------------|
| <b>Sn<sub>2</sub>H<sub>2</sub></b> | 24.74                  | <b>Sn<sub>2</sub>H</b>             | 18.22                  |
| <b>Sn<sub>2</sub>H<sub>4</sub></b> | 18.38                  | <b>Sn<sub>2</sub>H<sub>3</sub></b> | 21.53                  |
| <b>Sn<sub>2</sub>H<sub>6</sub></b> | 92.20                  | <b>Sn<sub>2</sub>H<sub>5</sub></b> | 79.69                  |
| <b>Sn<sub>3</sub>H<sub>2</sub></b> | 24.31                  | <b>Sn<sub>3</sub>H</b>             | 26.50                  |
| <b>Sn<sub>3</sub>H<sub>4</sub></b> | 35.29                  | <b>Sn<sub>3</sub>H<sub>3</sub></b> | 17.51                  |
| <b>Sn<sub>3</sub>H<sub>6</sub></b> | 45.13                  | <b>Sn<sub>3</sub>H<sub>5</sub></b> | 63.31                  |
| <b>Sn<sub>3</sub>H<sub>8</sub></b> | 38.27                  | <b>Sn<sub>3</sub>H<sub>7</sub></b> | 78.18                  |

## S6. Sn<sub>2</sub>H<sub>x</sub> and Sn<sub>3</sub>H<sub>y</sub> global minimum geometries (XYZ coordinates)

**Table S6.** Sn<sub>2</sub>H<sub>x</sub> and Sn<sub>3</sub>H<sub>y</sub> global minimum geometries

| Stoichiometry <sup>Multiplicity</sup>       | XYZ coordinates |              |              |              |
|---------------------------------------------|-----------------|--------------|--------------|--------------|
| Sn <sub>2</sub> H <sup>D</sup>              | Sn              | 0.455809605  | 1.057965691  | 0.602170708  |
|                                             | Sn              | -0.722583957 | -0.694937180 | -1.211623768 |
|                                             | H               | 0.644274352  | 0.755871488  | -1.364646940 |
| Sn <sub>2</sub> H <sup>Q</sup>              | Sn              | -0.855855565 | 1.083036929  | -2.116552219 |
|                                             | Sn              | 0.068411394  | -1.379685046 | -3.283676308 |
|                                             | H               | 0.229621849  | 2.249602849  | -2.939796990 |
| Sn <sub>2</sub> H <sub>2</sub> <sup>S</sup> | Sn              | -1.168891835 | 0.539021926  | 0.876332227  |
|                                             | Sn              | -0.641640985 | -1.125730054 | -1.293270526 |
|                                             | H               | 0.460578984  | 0.051558786  | -0.141380734 |
|                                             | H               | -1.135246164 | -1.424150659 | 0.603020033  |
| Sn <sub>2</sub> H <sub>2</sub> <sup>T</sup> | Sn              | -1.383802194 | -0.288377937 | -0.992194993 |
|                                             | Sn              | -0.092174588 | -0.019724261 | -3.623212588 |
|                                             | H               | 1.489893209  | 0.547694292  | -2.997176584 |
|                                             | H               | -0.100016587 | -1.316809165 | -2.124449663 |
| Sn <sub>2</sub> H <sub>3</sub> <sup>D</sup> | Sn              | 0.728392883  | -0.036499175 | 1.224101472  |
|                                             | Sn              | -1.151746714 | -1.117196581 | 3.523830706  |
|                                             | H               | -1.001515628 | 0.248097254  | 2.095312046  |
|                                             | H               | 0.519606960  | -1.484688730 | 2.525223968  |
|                                             | H               | 1.457662499  | 0.930487232  | 2.544532808  |
| Sn <sub>2</sub> H <sub>3</sub> <sup>Q</sup> | Sn              | -1.180009548 | 1.194370850  | -1.937950877 |
|                                             | Sn              | 0.897023206  | -0.619859515 | -2.573954891 |
|                                             | H               | 0.273488407  | -2.150436022 | -3.130868960 |
|                                             | H               | 1.937913482  | 0.005136936  | -3.826139109 |
|                                             | H               | -2.359361077 | 1.705374011  | -3.142099579 |
| Sn <sub>2</sub> H <sub>4</sub> <sup>S</sup> | Sn              | -1.136889863 | 0.737481406  | 2.668745389  |
|                                             | Sn              | 1.993939611  | 0.824792450  | 3.070611411  |
|                                             | H               | 0.559451265  | 1.167654893  | 1.766359678  |
|                                             | H               | 1.698843532  | 2.504786224  | 3.624959880  |
|                                             | H               | -0.841946562 | -0.942527657 | 2.114360621  |
|                                             | H               | 0.297603017  | 0.394512684  | 3.972963021  |

|                                                              |    |              |              |              |
|--------------------------------------------------------------|----|--------------|--------------|--------------|
| Sn <sub>2</sub> H <sub>4</sub> <sup>T</sup>                  | Sn | 0.127966896  | 0.657789334  | -1.247555190 |
|                                                              | Sn | -0.805856238 | -0.287436401 | -3.763785876 |
|                                                              | H  | -0.800836128 | -2.029903416 | -3.853919560 |
|                                                              | H  | -2.461394049 | 0.194743798  | -3.993469026 |
|                                                              | H  | -1.099835032 | 0.561821053  | -0.011842701 |
|                                                              | H  | 1.439375417  | -0.341698801 | -0.693518192 |
| Sn <sub>2</sub> H <sub>5</sub> <sup>D</sup>                  | Sn | 2.108958485  | -1.014456080 | -1.267037167 |
|                                                              | Sn | -0.229803067 | -0.594680124 | 0.258604416  |
|                                                              | H  | 0.043847149  | 0.570262847  | 1.519175959  |
|                                                              | H  | 1.822269561  | -2.224955236 | -2.453422332 |
|                                                              | H  | -0.704566315 | -2.051903717 | 1.078808485  |
|                                                              | H  | 3.445774704  | -1.514575112 | -0.300436881 |
| Sn <sub>2</sub> H <sub>5</sub> <sup>Q</sup><br>(Dissociated) | Sn | 0.774645435  | -1.544662833 | -2.444312283 |
|                                                              | Sn | -1.467118107 | 1.389764887  | -2.708439838 |
|                                                              | H  | -0.198792543 | 2.006288709  | -1.705242984 |
|                                                              | H  | -0.765551939 | 0.237589885  | -3.829864688 |
|                                                              | H  | 2.317545508  | -0.860851791 | -2.866044948 |
|                                                              | H  | 0.811915247  | -2.881030083 | -1.314928960 |
| Sn <sub>2</sub> H <sub>6</sub> <sup>S</sup>                  | Sn | -1.728288171 | 2.399635986  | -1.461194687 |
|                                                              | Sn | -1.667016244 | -0.290618532 | -2.230362443 |
|                                                              | H  | -1.877115181 | -1.321613474 | -0.870779733 |
|                                                              | H  | -1.515405161 | 3.431417204  | -2.819740921 |
|                                                              | H  | -0.477773966 | 2.745348689  | -0.333290506 |
|                                                              | H  | -0.165803436 | -0.685573201 | -2.969086987 |
| Sn <sub>2</sub> H <sub>6</sub> <sup>T</sup><br>(Dissociated) | Sn | -0.779116539 | 0.688312879  | -0.774565165 |
|                                                              | Sn | 0.355316694  | -1.036894448 | -5.550831415 |
|                                                              | H  | 0.644980905  | -1.868181247 | -4.059873504 |
|                                                              | H  | -0.789551875 | 0.234594764  | -5.288938857 |
|                                                              | H  | 0.450175257  | 1.071092038  | 0.380994843  |
|                                                              | H  | -2.221560436 | 1.547762315  | -0.357507963 |
| Sn <sub>3</sub> H <sup>D</sup>                               | Sn | 1.842826236  | -0.351852463 | -6.107688662 |
|                                                              | H  | -0.254997842 | 1.203998778  | -2.342510081 |
|                                                              | Sn | -0.260576098 | 1.528499565  | -0.072908291 |
|                                                              | Sn | -1.835210267 | 0.420616079  | 2.049172118  |
| Sn <sub>3</sub> H <sup>Q</sup>                               | Sn | 0.292316021  | -1.176097144 | 1.011428514  |
|                                                              | Sn | 0.972170344  | 0.047782499  | -0.345492340 |
|                                                              | Sn | -0.878904482 | -1.911970184 | 1.678454202  |
|                                                              | Sn | -0.445674209 | 0.413480343  | 3.297715793  |
| Sn <sub>3</sub> H <sub>2</sub> <sup>S</sup>                  | Sn | 0.562222516  | 0.435443194  | 0.465397541  |
|                                                              | H  | 2.180251242  | -0.181949658 | 0.941862921  |
|                                                              | Sn | 0.727902074  | 0.878723511  | -0.293740091 |
|                                                              | Sn | -2.185837247 | 1.386181862  | -0.703742448 |
| Sn <sub>3</sub> H <sub>2</sub> <sup>S</sup>                  | Sn | -1.374888301 | -1.155232380 | 0.291785180  |
|                                                              | H  | 0.466278130  | -1.095818737 | 0.403470065  |
|                                                              | H  | -0.633954657 | 2.351845744  | -0.955673706 |
|                                                              | H  |              |              |              |

|                                                              |    |              |              |              |
|--------------------------------------------------------------|----|--------------|--------------|--------------|
| Sn <sub>3</sub> H <sub>2</sub> <sup>T</sup>                  | Sn | 1.819015600  | -0.495908174 | 0.339710660  |
|                                                              | Sn | -0.496589471 | -0.098972894 | 2.437990706  |
|                                                              | Sn | -1.106874866 | -1.148212326 | -0.184995000 |
|                                                              | H  | 1.451281803  | 0.090712244  | 2.188339902  |
|                                                              | H  | 1.497419838  | 1.203845124  | -0.148345150 |
| Sn <sub>3</sub> H <sub>3</sub> <sup>D</sup>                  | Sn | 1.270036351  | -2.117935150 | -0.084955123 |
|                                                              | Sn | 2.122325053  | 0.285600977  | 1.365933310  |
|                                                              | Sn | -0.784830911 | 0.169562463  | 0.292319488  |
|                                                              | H  | -1.129624630 | -0.724233903 | 1.819455116  |
|                                                              | H  | 2.016996117  | -1.664211748 | 1.695523326  |
| Sn <sub>3</sub> H <sub>3</sub> <sup>Q</sup>                  | Sn | 0.035456475  | -1.176831615 | -1.600753075 |
|                                                              | Sn | -2.130027714 | -1.997140502 | 0.416598938  |
|                                                              | Sn | 0.590293838  | -1.180064496 | 1.597191150  |
|                                                              | H  | 1.391981093  | -1.005300651 | -0.200049811 |
|                                                              | H  | 1.460122339  | -2.737062241 | 1.688362147  |
| Sn <sub>3</sub> H <sub>4</sub> <sup>S</sup>                  | Sn | 1.270036351  | -2.117935150 | -0.084955123 |
|                                                              | Sn | 2.122325053  | 0.285600977  | 1.365933310  |
|                                                              | Sn | -0.784830911 | 0.169562463  | 0.292319488  |
|                                                              | H  | -1.129624630 | -0.724233903 | 1.819455116  |
|                                                              | H  | 2.016996117  | -1.664211748 | 1.695523326  |
| Sn <sub>3</sub> H <sub>4</sub> <sup>T</sup>                  | Sn | 1.108813886  | 1.446263376  | -0.329519839 |
|                                                              | Sn | -0.865860449 | -0.760226034 | 0.227071069  |
|                                                              | Sn | 1.103240437  | -1.473085089 | -2.047657010 |
|                                                              | H  | -0.011258120 | 2.296339706  | -1.432799959 |
|                                                              | H  | -0.158512626 | -1.718899669 | 1.544412204  |
| Sn <sub>3</sub> H <sub>5</sub> <sup>D</sup>                  | Sn | 1.630671826  | 0.404869612  | -1.932680241 |
|                                                              | H  | 2.473710033  | -1.787198681 | -0.943286883 |
|                                                              | Sn | -0.103492749 | 2.509491813  | -0.686055649 |
|                                                              | Sn | 1.650306233  | 0.143518363  | -0.855524732 |
|                                                              | Sn | -0.492812347 | -0.407667952 | 1.096992949  |
| Sn <sub>3</sub> H <sub>5</sub> <sup>Q</sup>                  | H  | 3.259921620  | 0.083209855  | -0.226019295 |
|                                                              | H  | 0.610464498  | 0.388460135  | 2.263915851  |
|                                                              | H  | -1.046873538 | 1.412445316  | 0.631283286  |
|                                                              | H  | 1.748606235  | -0.576593089 | -2.425105841 |
|                                                              | H  | -1.105090839 | 1.650890808  | -1.898576560 |
| Sn <sub>3</sub> H <sub>5</sub> <sup>Q</sup><br>(Dissociated) | Sn | 1.362448749  | 1.032395524  | -1.640388479 |
|                                                              | Sn | -0.898968687 | -0.220771586 | -0.363625744 |
|                                                              | Sn | 1.261027381  | 0.198235221  | 2.841808268  |
|                                                              | H  | 2.353836133  | 0.656509565  | 1.596930720  |
|                                                              | H  | 1.446891161  | -1.453556453 | 3.250318839  |
|                                                              | H  | -0.337858978 | 0.476167676  | 2.227550498  |
|                                                              | H  | -0.026901746 | -1.617035088 | 0.367292834  |
|                                                              | H  | 1.484759519  | 1.180068172  | 4.234454243  |

|                                                              |              |              |              |              |
|--------------------------------------------------------------|--------------|--------------|--------------|--------------|
| Sn <sub>3</sub> H <sub>6</sub> <sup>S</sup>                  | Sn           | -0.323580236 | -0.111673417 | -2.626071896 |
|                                                              | Sn           | -0.652287545 | 2.082178206  | -0.359965320 |
|                                                              | Sn           | 0.669314319  | 0.156202929  | 1.395368646  |
|                                                              | H            | 2.160909479  | 0.725530774  | 2.061677337  |
|                                                              | H            | -1.489182075 | 0.479880694  | -1.145407278 |
|                                                              | H            | -1.139882918 | 1.147531107  | -3.611278590 |
|                                                              | H            | 1.061182909  | -1.316509864 | 0.566479028  |
|                                                              | H            | -0.286243290 | -0.318564374 | 2.757372070  |
|                                                              | H            | 0.594368358  | 1.382623944  | -1.717372998 |
| Sn <sub>3</sub> H <sub>6</sub> <sup>T</sup><br>(Dissociated) | Sn           | -0.715472411 | -1.943101506 | 0.840735746  |
|                                                              | Sn           | -1.131902118 | 1.927526844  | 1.445634563  |
|                                                              | Sn           | -2.013906575 | -0.819382457 | -1.373666977 |
|                                                              | H            | -1.402026774 | -2.676676814 | 2.265020430  |
|                                                              | H            | -1.122494529 | 0.608767023  | 2.555667038  |
|                                                              | H            | -2.461102031 | 1.688007011  | 0.373064190  |
|                                                              | H            | -1.300727586 | 3.417819859  | 2.286620150  |
|                                                              | H            | 0.942270444  | -1.700751221 | 1.327553225  |
|                                                              | H            | 0.327397818  | 1.906303351  | 0.546405865  |
| Sn <sub>3</sub> H <sub>7</sub> <sup>D</sup>                  | Sn           | 0.661768027  | 4.074161993  | -0.510711951 |
|                                                              | Sn           | -0.593782772 | -0.435131990 | -0.382228647 |
|                                                              | Sn           | 1.529594229  | 1.392030302  | -0.788310329 |
|                                                              | H            | -0.114643601 | -2.046025853 | -0.747962067 |
|                                                              | H            | -1.170184845 | -0.407504601 | 1.242382033  |
|                                                              | H            | -0.853815257 | 4.243992686  | -1.309049970 |
|                                                              | H            | -1.903238088 | -0.027864298 | -1.421626047 |
|                                                              | H            | 0.464327364  | 4.540900523  | 1.136248753  |
|                                                              | H            | 2.735366692  | 1.077816683  | 0.432035750  |
| H                                                            | 1.774208250  | 5.166424554  | -1.236778526 |              |
| Sn <sub>3</sub> H <sub>7</sub> <sup>Q</sup><br>(Dissociated) | Sn           | -2.432827335 | 0.120083583  | -2.377562502 |
|                                                              | Sn           | -0.448026756 | 2.126667603  | 0.914190027  |
|                                                              | Sn           | 0.676439113  | -0.421510797 | 0.300996349  |
|                                                              | H            | 0.102420465  | 2.636225571  | 2.489587556  |
|                                                              | H            | -0.370287157 | -1.198846089 | -0.875022261 |
|                                                              | H            | -3.578664106 | 0.716442319  | -3.539917304 |
|                                                              | H            | -3.271406296 | -0.306746048 | -0.923001679 |
|                                                              | H            | 0.728280821  | -1.521690686 | 1.658131219  |
|                                                              | H            | -2.189170211 | 2.047320863  | 1.004251772  |
| H                                                            | -1.336298879 | 1.414477825  | -1.977454591 |              |
| Sn <sub>3</sub> H <sub>8</sub> <sup>S</sup>                  | Sn           | -2.687690496 | -2.412720421 | 2.718530313  |
|                                                              | Sn           | 0.955669900  | 0.098283015  | 1.210194954  |
|                                                              | Sn           | -0.502040706 | -2.286437453 | 0.963697809  |
|                                                              | H            | -0.044798586 | 1.454579541  | 0.868064484  |
|                                                              | H            | 0.542537991  | -3.626120429 | 1.257713639  |
|                                                              | H            | 1.552775058  | 0.275470758  | 2.813238049  |
|                                                              | H            | 2.295768526  | 0.136872123  | 0.133429393  |
|                                                              | H            | -2.158175246 | -2.305613076 | 4.351112096  |
|                                                              | H            | -3.561441767 | -3.882577720 | 2.536077729  |
|                                                              | H            | -1.060894032 | -2.449363123 | -0.658991142 |
|                                                              | H            | -3.769911642 | -1.108372216 | 2.427231678  |



|                                                     |    |              |              |              |
|-----------------------------------------------------|----|--------------|--------------|--------------|
| $\text{Sn}_3\text{H}_8^{\ddagger}$<br>(Dissociated) | Sn | -2.444523113 | 0.404854341  | -3.215726260 |
|                                                     | Sn | 1.583919828  | -1.145546368 | -3.434174691 |
|                                                     | Sn | -0.514459609 | 2.485044093  | -3.011197700 |
|                                                     | H  | 0.193223153  | -1.155257555 | -4.446044087 |
|                                                     | H  | 1.994056262  | -2.751107061 | -2.994194202 |
|                                                     | H  | 2.894042954  | -0.408906845 | -4.259762082 |
|                                                     | H  | 1.215773522  | -0.239452373 | -2.021749508 |
|                                                     | H  | -4.010806247 | 0.623653704  | -2.452054890 |
|                                                     | H  | -1.175558353 | 3.995052107  | -3.512309903 |
|                                                     | H  | 0.095783869  | 2.625154517  | -1.406115160 |
|                                                     | H  | 0.770130522  | 2.034099282  | -4.064713158 |

### S7. AdNDP analysis of $\text{Sn}_2\text{H}_x$ and $\text{Sn}_3\text{H}_y$ global minimum structures

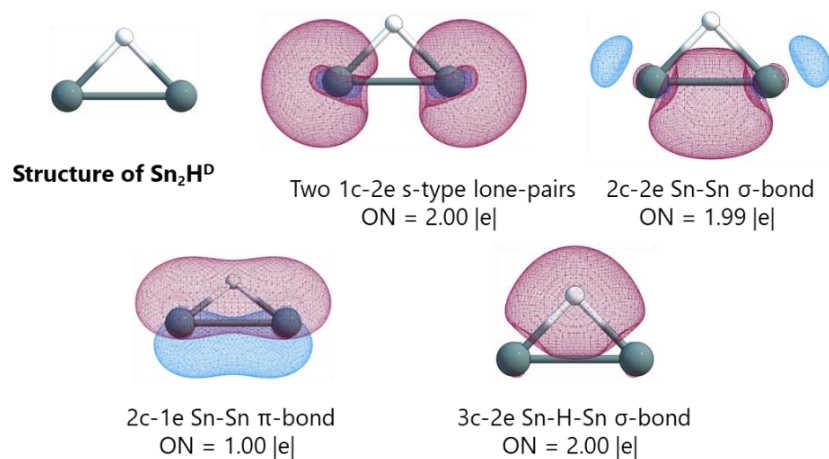

**Figure S7-A.** AdNDP analysis of  $\text{Sn}_2\text{H}$

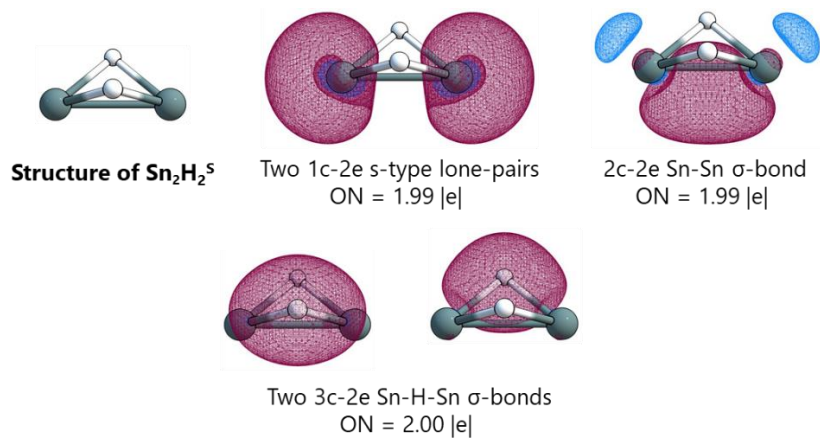

**Figure S7-B.** AdNDP analysis of  $\text{Sn}_2\text{H}_2$

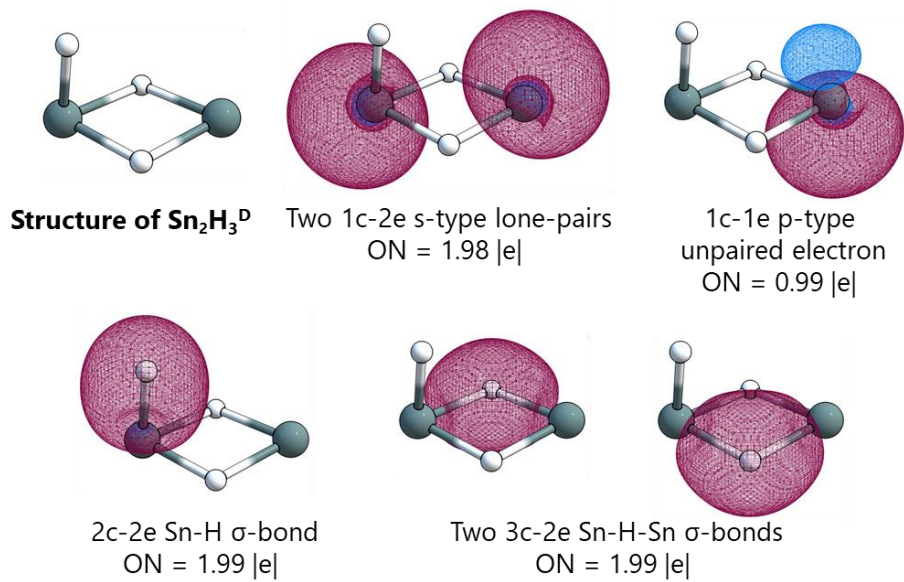

**Figure S7-C.** AdNDP analysis of  $\text{Sn}_2\text{H}_3$

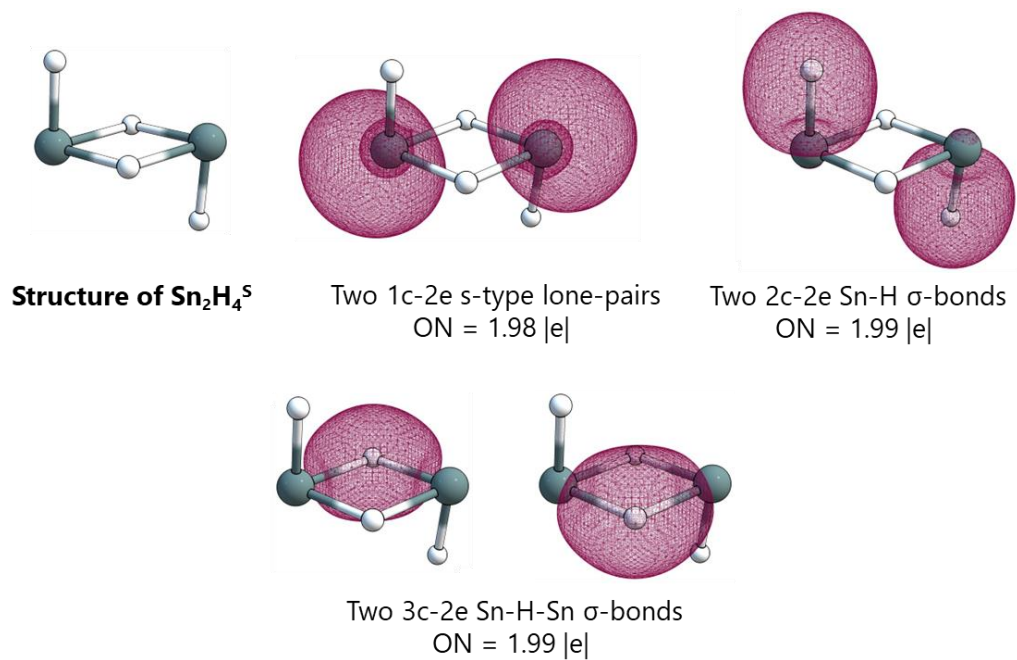

**Figure S7-D.** AdNDP analysis of  $\text{Sn}_2\text{H}_4$

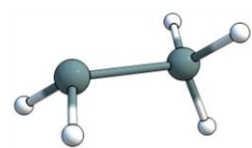

**Structure of  $\text{Sn}_2\text{H}_5^{\text{D}}$**

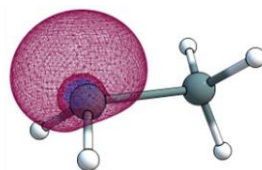

1c-1e s-type  
unpaired electron  
ON = 0.99 |e|

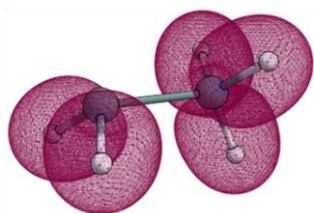

Five 2c-2e Sn-H  $\sigma$ -bonds  
ON = 2.00–1.99 |e|

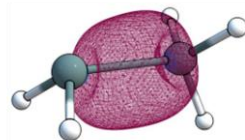

2c-2e Sn-Sn  $\sigma$ -bonds  
ON = 2.00 |e|

**Figure S7-E. AdNDP analysis of  $\text{Sn}_2\text{H}_5$**

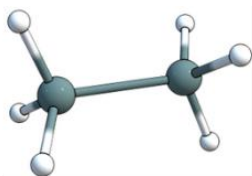

**Structure of  $\text{Sn}_2\text{H}_6^{\text{S}}$**

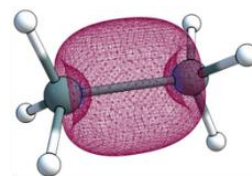

2c-2e Sn-Sn  $\sigma$ -bonds  
ON = 2.00 |e|

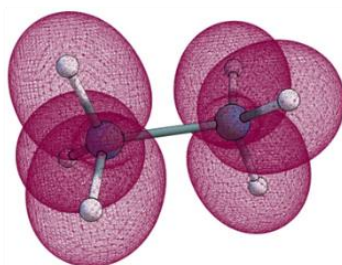

Six 2c-2e Sn-H  $\sigma$ -bonds  
ON = 2.00–1.99 |e|

**Figure S7-F. AdNDP analysis of  $\text{Sn}_2\text{H}_6$**

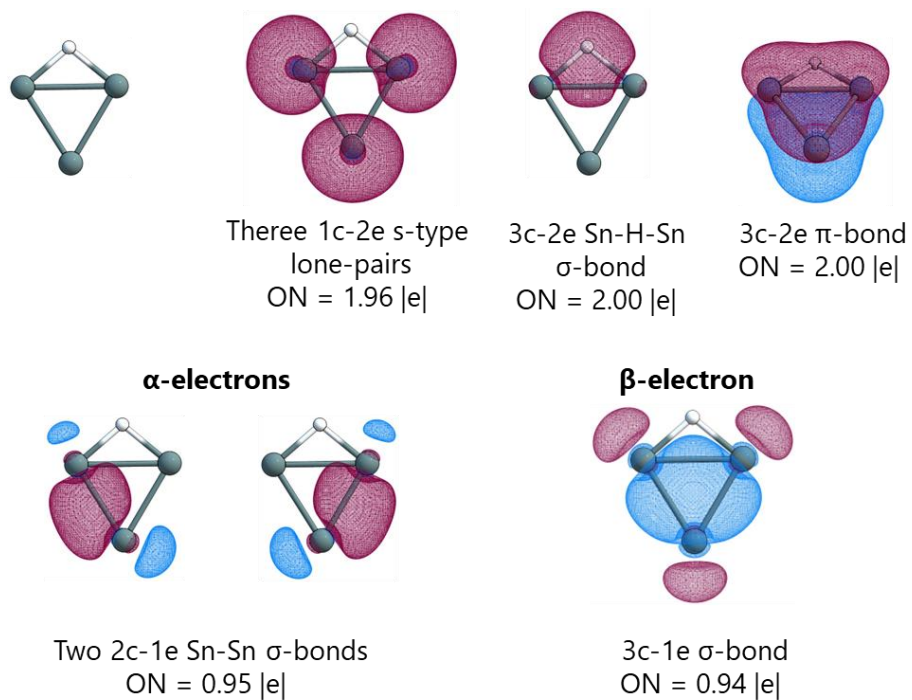

**Figure S7-G.** AdNDP analysis of  $\text{Sn}_3\text{H}$

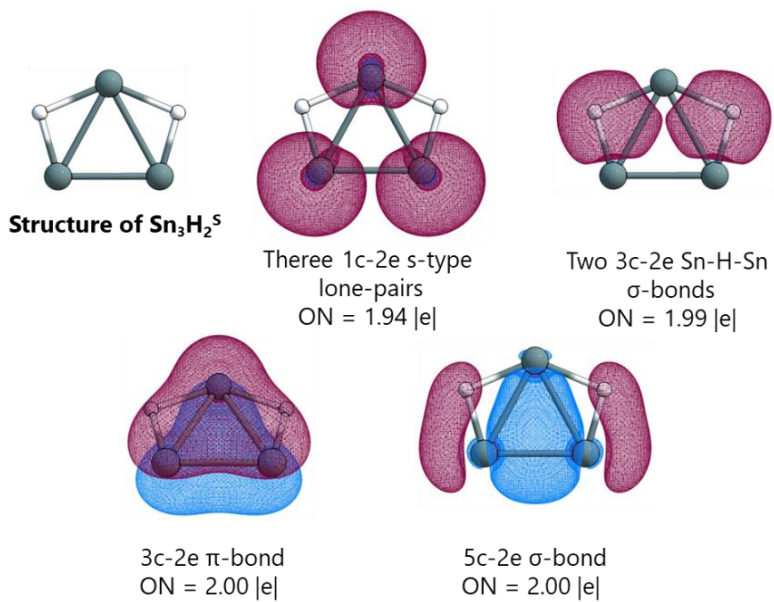

**Figure S7-H.** AdNDP analysis of  $\text{Sn}_3\text{H}_2$

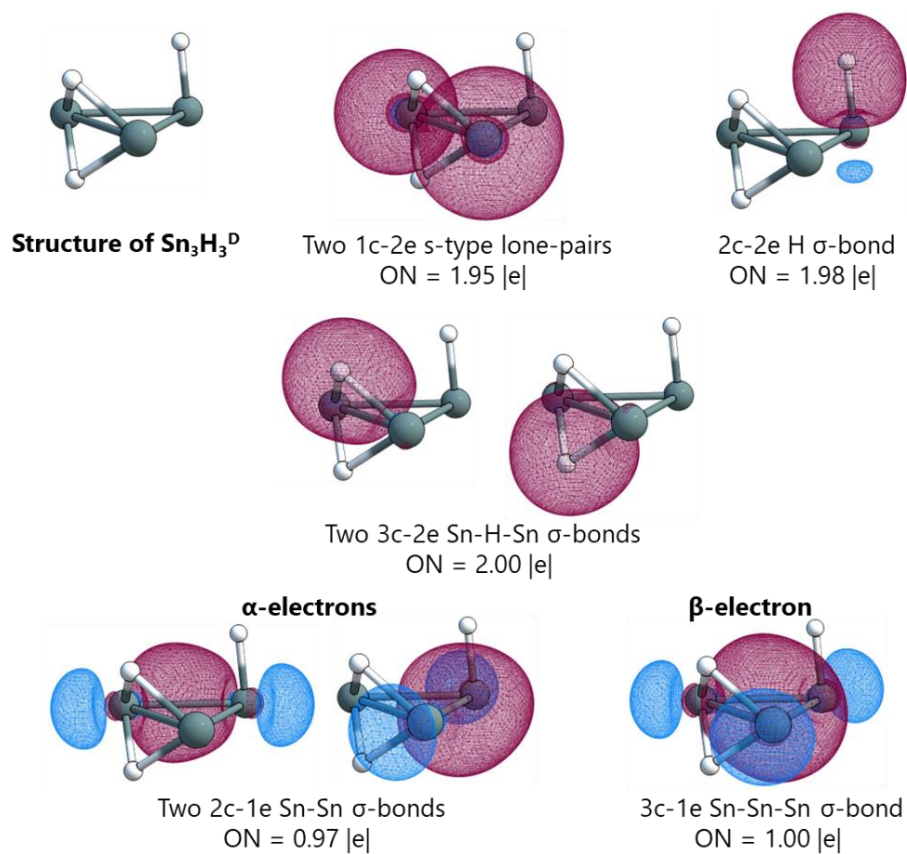

**Figure S7-I.** AdNDP analysis of  $\text{Sn}_3\text{H}_3$

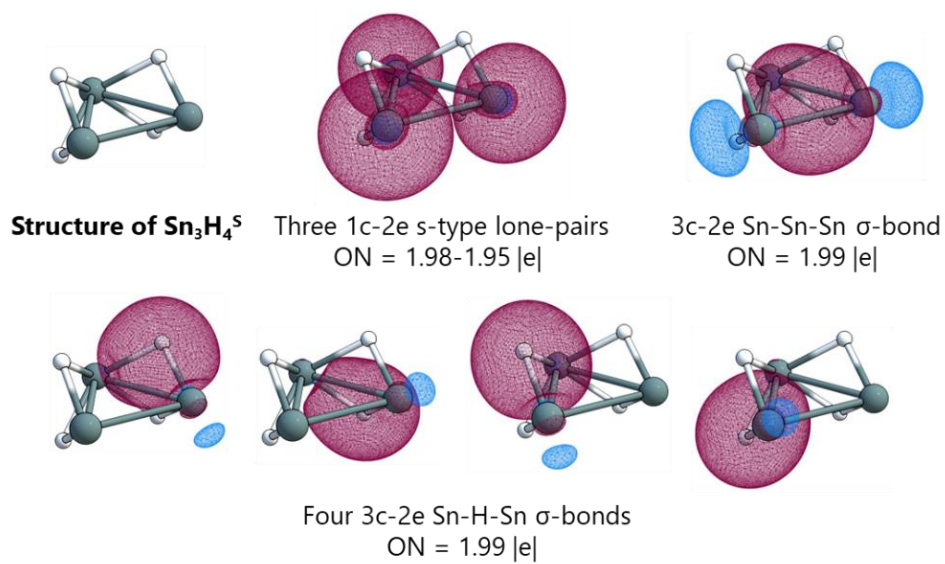

**Figure S7-J.** AdNDP analysis of  $\text{Sn}_3\text{H}_4$



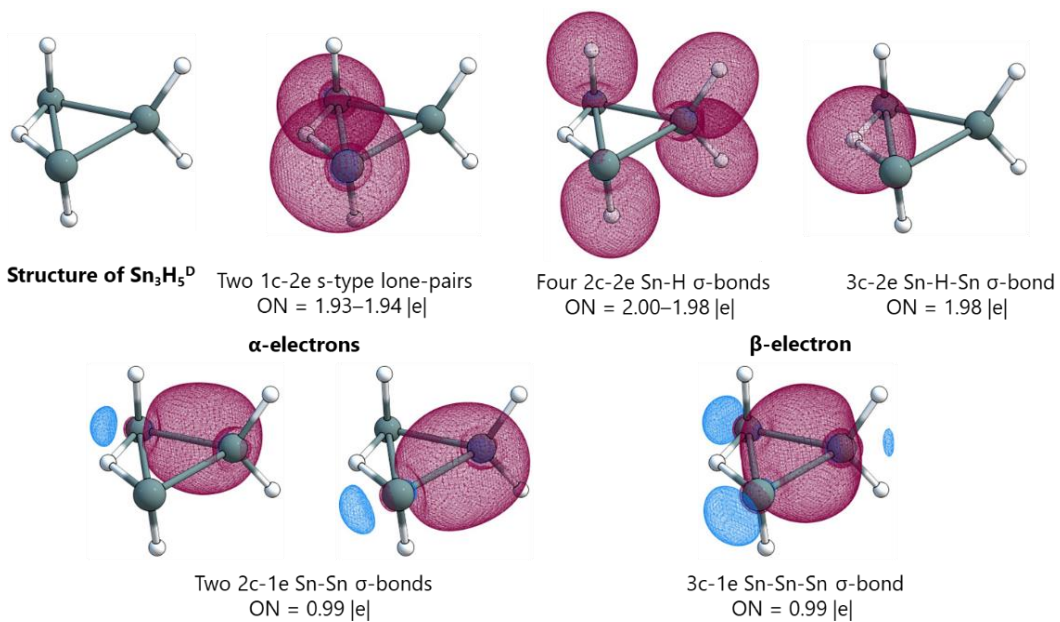

**Figure S7-K.** AdNDP analysis of  $\text{Sn}_3\text{H}_5$

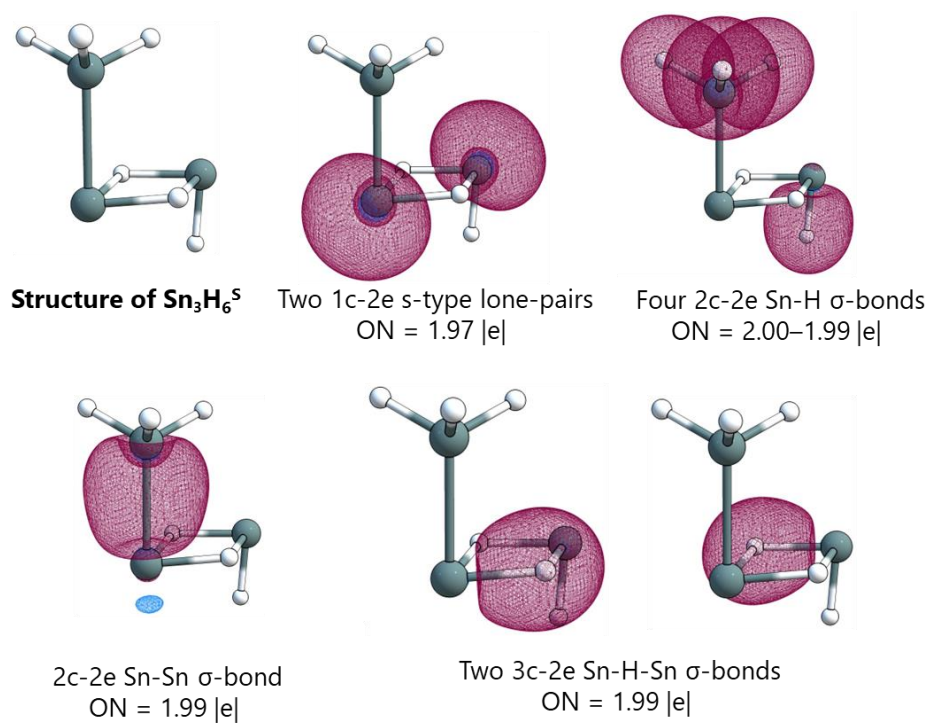

**Figure S7-L.** AdNDP analysis of  $\text{Sn}_3\text{H}_6$

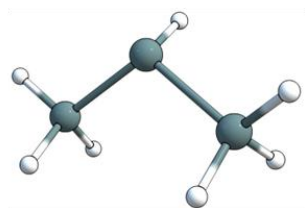

**Structure of  $\text{Sn}_3\text{H}_7^{\text{D}}$**

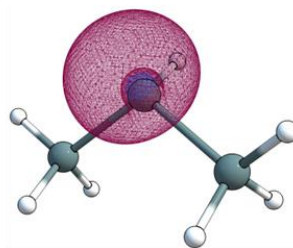

1c-1e s-type unpaired electron  
ON = 0.98 |e|

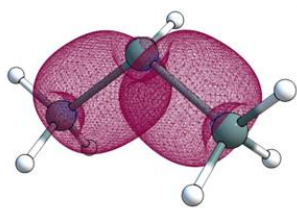

Two 2c-2e Sn-Sn  $\sigma$ -bonds  
ON = 1.99 |e|

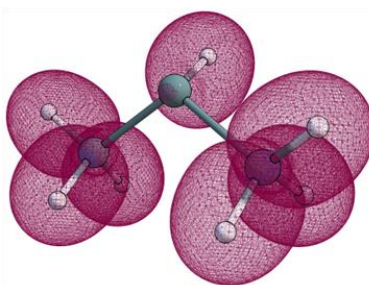

Seven 2c-2e Sn-H  $\sigma$ -bonds  
ON = 1.99 |e|

**Figure S7-M. AdNDP analysis of  $\text{Sn}_3\text{H}_7$**

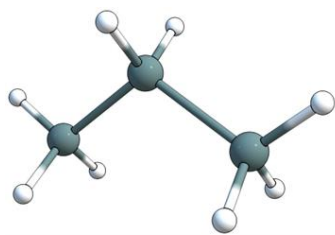

**Structure of  $\text{Sn}_3\text{H}_8^{\text{S}}$**

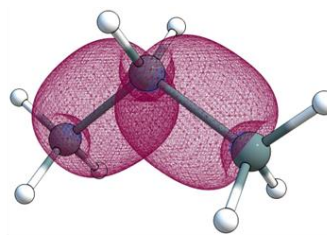

Two 2c-2e Sn-Sn  $\sigma$ -bonds  
ON = 1.99 |e|

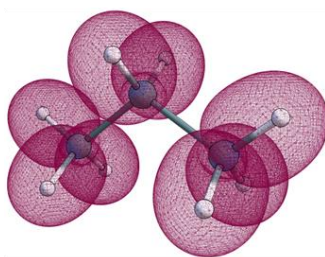

Eight 2c-2e Sn-H  $\sigma$ -bonds  
ON = 2.00–1.99 |e|

**Figure S7-N. AdNDP analysis of  $\text{Sn}_3\text{H}_8$**

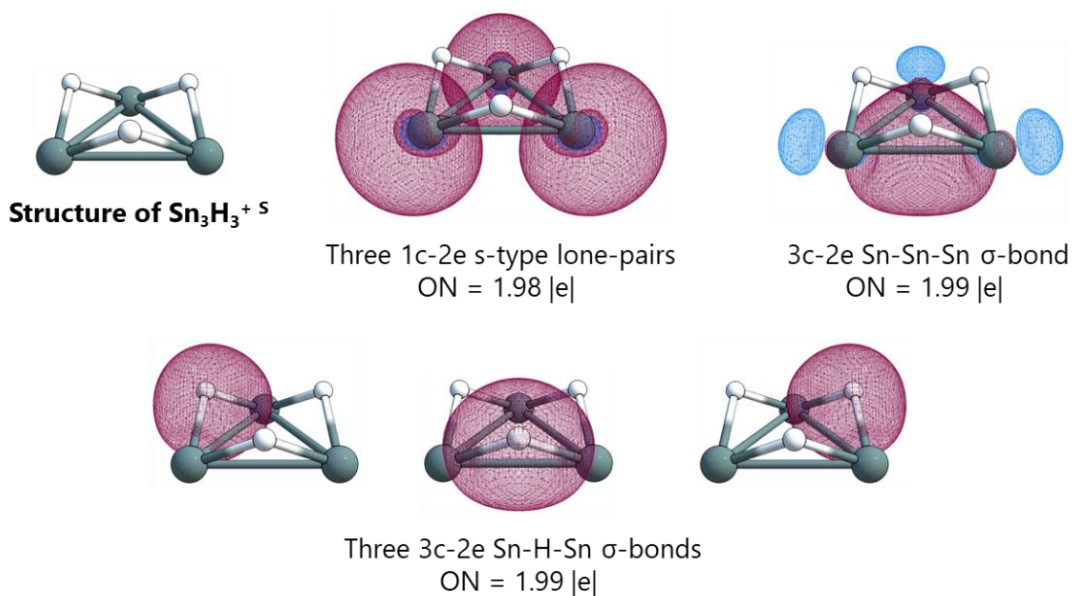

**Figure S7-O.** AdNDP analysis of  $\text{Sn}_3\text{H}_3^+$

**S8. AdNDP analysis of  $\text{Sn}_2\text{H}_x$  and  $\text{Sn}_3\text{H}_y$  classic-like structures**

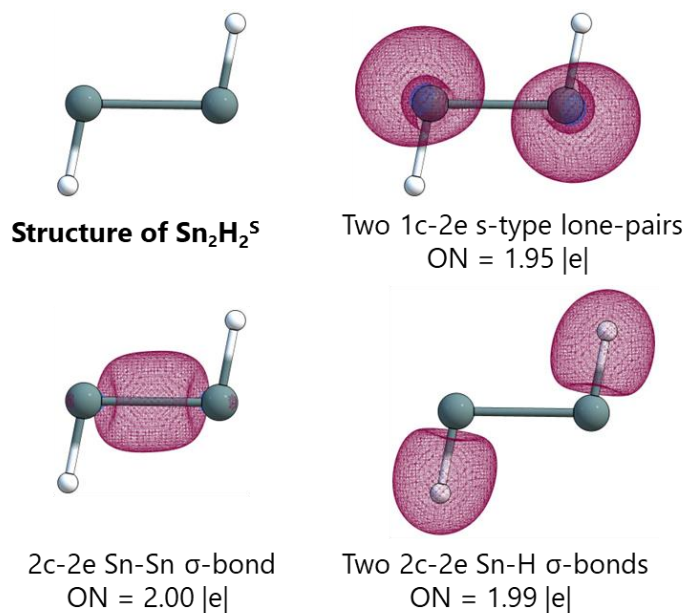

**Figure S8-A.** AdNDP analysis of classic-like  $\text{Sn}_2\text{H}_2$



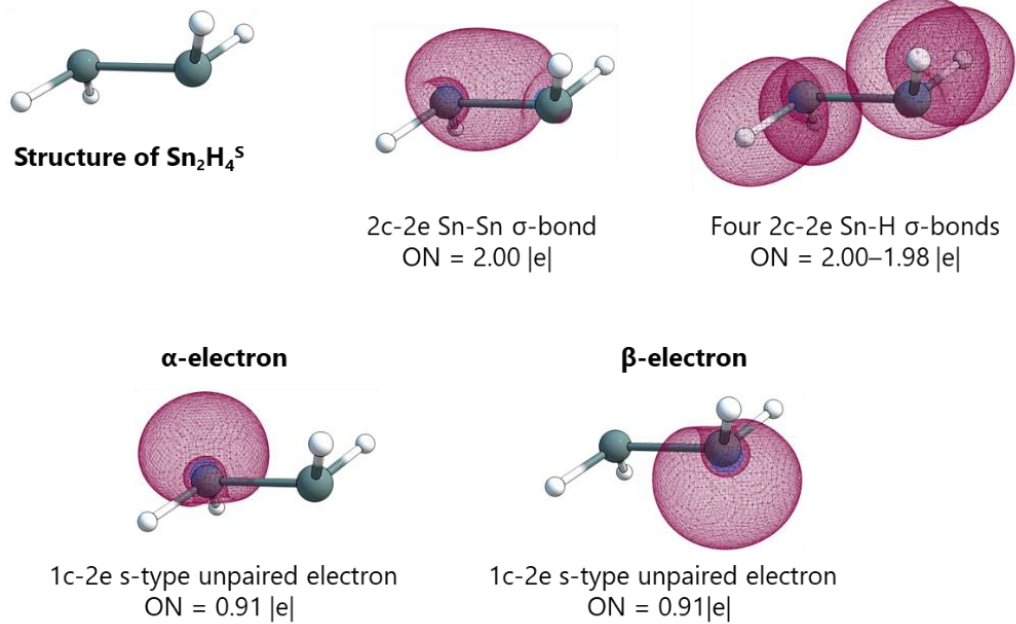

**Figure S8-B.** AdNDP analysis of classic-like  $\text{Sn}_2\text{H}_4$

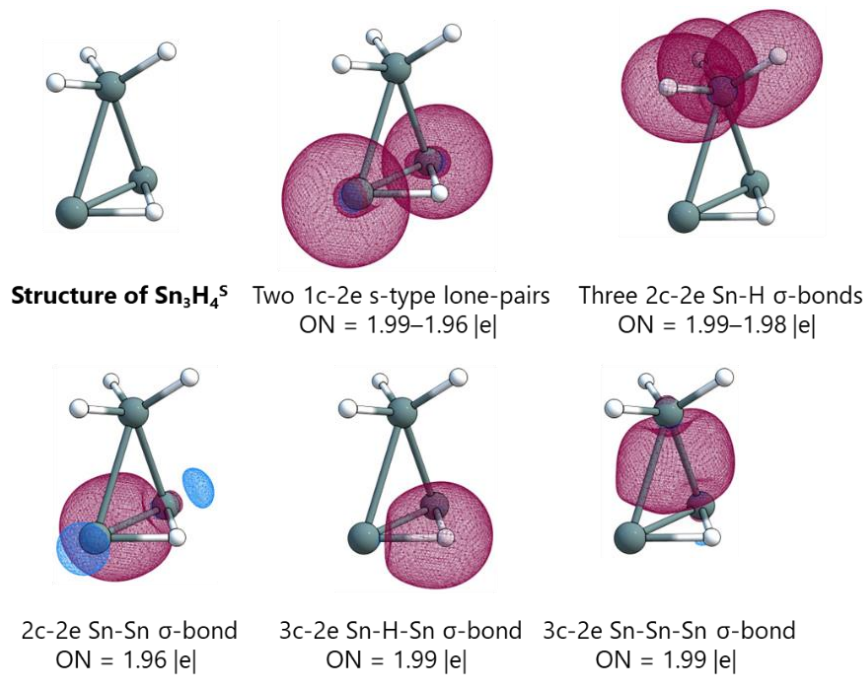

**Figure S8-C.** AdNDP analysis of classic-like  $\text{Sn}_3\text{H}_4$

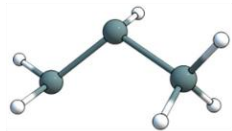

**Structure of  $\text{Sn}_3\text{H}_6^{5-}$**

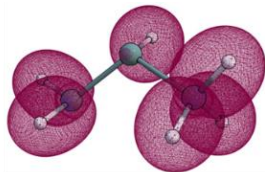

Six 2c-2e Sn-H  $\sigma$ -bonds  
ON = 2.00–1.99 |e|

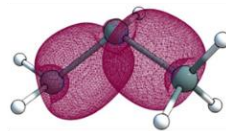

Two 2c-2e Sn-Sn  $\sigma$ -bonds  
ON = 2.00–1.98 |e|

**$\alpha$ -electron**

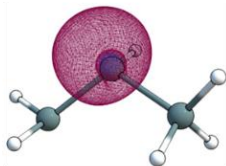

1c-1e s-type unpaired electron  
ON = 0.92 |e|

**$\beta$ -electron**

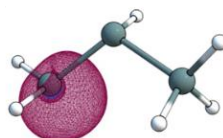

1c-1e s-type unpaired electron  
ON = 0.89 |e|

**Figure S8-D.** AdNDP analysis of classic-like  $\text{Sn}_3\text{H}_6$

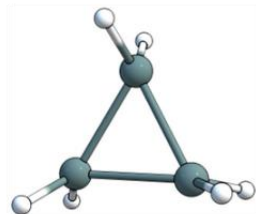

**Structure of  $\text{Sn}_3\text{H}_6^{5-}$**

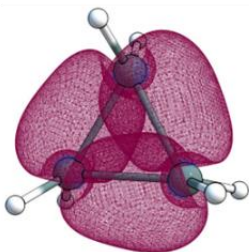

Three 2c-2e Sn-Sn  $\sigma$ -bond  
ON = 1.98 |e|

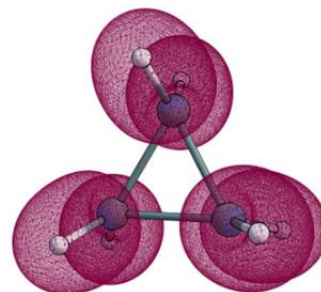

Six 2c-2e Sn-H  $\sigma$ -bonds  
ON = 2.00 |e|

**Figure S8-E.** AdNDP analysis of cyclic  $\text{Sn}_3\text{H}_6$

### S9. Coordinates (XYZ) of classic-like Sn<sub>2</sub>H<sub>x</sub> and Sn<sub>3</sub>H<sub>y</sub> structures

**Table S9.** Coordinates (XYZ) of classic-like Sn<sub>2</sub>H<sub>x</sub> and Sn<sub>3</sub>H<sub>y</sub> structures

| Stoichiometry                            | XYZ coordinates |              |              |              |
|------------------------------------------|-----------------|--------------|--------------|--------------|
| Sn <sub>2</sub> H <sub>2</sub>           | Sn              | -0.052107602 | 0.253457424  | -2.161585874 |
|                                          | Sn              | 0.305843612  | -0.088544125 | -4.987446994 |
|                                          | H               | -0.868668658 | 1.082565992  | -5.597212926 |
|                                          | H               | 1.124761157  | -0.915389698 | -1.552007619 |
| Sn <sub>2</sub> H <sub>4</sub>           | Sn              | 0.528420792  | -1.038109843 | 0.601377775  |
|                                          | Sn              | 0.458779058  | 1.651223782  | 0.068519251  |
|                                          | H               | -1.043806132 | -1.737300185 | 0.791649764  |
|                                          | H               | 1.355792278  | -1.420522061 | 2.073171000  |
|                                          | H               | -0.369209987 | 2.033071807  | -1.403085620 |
|                                          | H               | 2.030723990  | 2.350836499  | -0.122431170 |
| Sn <sub>3</sub> H <sub>4</sub>           | Sn              | -3.195421975 | -0.714993330 | -2.320060726 |
|                                          | Sn              | -0.572124236 | 0.004624052  | -3.526049169 |
|                                          | Sn              | -1.480155297 | 0.297186907  | -0.415219827 |
|                                          | H               | -1.031696430 | 1.097304871  | -4.772471808 |
|                                          | H               | -1.921273021 | -1.537000617 | -0.970379118 |
|                                          | H               | 0.153364563  | -1.385108927 | -4.227393831 |
|                                          | H               | 0.700371967  | 0.798434152  | -2.645934895 |
| Aliphatic Sn <sub>3</sub> H <sub>6</sub> | Sn              | -0.075224180 | -0.404509482 | -2.554570176 |
|                                          | Sn              | -0.162600956 | -0.038611426 | -5.266461647 |
|                                          | Sn              | 1.815039631  | 1.277764306  | -1.291786391 |
|                                          | H               | -1.395350176 | -0.901869692 | -6.118878653 |
|                                          | H               | 1.310705578  | -0.429468231 | -6.083180642 |
|                                          | H               | -1.618332059 | -0.029158342 | -1.857657580 |
|                                          | H               | 1.215392467  | 2.867284087  | -1.035202599 |
|                                          | H               | 3.230664236  | 1.372061888  | -2.261228216 |
|                                          | H               | 2.249233572  | 0.612675196  | 0.232396297  |
| Cyclic Sn <sub>3</sub> H <sub>6</sub>    | Sn              | -2.046368070 | -1.339217661 | -1.498850461 |
|                                          | Sn              | 0.141085460  | 0.276043867  | -2.344438292 |
|                                          | Sn              | -0.215591098 | -0.302394718 | 0.424113049  |
|                                          | H               | 0.037698416  | 1.957213715  | -2.707789658 |
|                                          | H               | 1.621936613  | -0.332952307 | -2.981209078 |
|                                          | H               | -0.953965024 | 0.762464752  | 1.559960106  |
|                                          | H               | 0.630727064  | -1.527612013 | 1.291016215  |
|                                          | H               | -1.996569787 | -2.939172669 | -2.136911363 |
|                                          | H               | -3.583163575 | -0.650713965 | -1.864243519 |
